# Supplementary material for: The power of model-to-crop translation illustrated by reducing seed loss from pod shatter in oilseed rape
Source: PubMed Central journal article supplement (PMC6820617; doi:10.1007/s00497-019-00374-9), 2019-06-20
Supplement: 497_2019_374_MOESM1_ESM.pdf [file 497_2019_374_MOESM1_ESM.pdf]

# Online Resource 1

|            |                                                                                                                |     |
|------------|----------------------------------------------------------------------------------------------------------------|-----|
| HEC        | -----MNNYNMNP <del>S</del> LFQNYTWNNIINSSNNNNK--NDDHHHQHNNDPIGMAMDQYTQLHI                                      | 53  |
| IND        | MMEPQPHHLLMD-----WNKANDLLTQEHA AFLNDPHHLLMLDPP-----                                                            | 39  |
| BraA.IND.a | MME--HHHLLMN-----WNKPIDLITEENS--FNHNPHFIVDPP-----                                                              | 35  |
| BnaA.IND.a | MME--HHHLLMN-----WNKPIDLITEENS--FNHNPHFIVDPP-----                                                              | 35  |
| BolC.IND.a | MME--PHHLLMN-----WNKPIDLITQENS--FNHNPHFMVDPP-----                                                              | 35  |
| BnaC.IND.a | MME--PHHLLMN-----WNKPIDLITQENS--FNHNPHFMVDPP-----                                                              | 35  |
|            | ::  *::      **::  :  .:::      :  *  :  *                                                                     |     |
|            |                                                                                                                |     |
| HEC        | FNPFSSSHFPPLSSSLTTTTLLSGDQEDDEDEEEPLEELGAMKEMMYKIAAMQSV <del>D</del> IDPA                                      | 113 |
| IND        | --PETLIHLD-----EDEEYDEDMDAMKEMQYMI <del>A</del> VMPVDIDPA                                                      | 77  |
| BraA.IND.a | --SETLSHFQPPPTIFSDHG--GGEEAE <del>E</del> EEEEEEEGEEEMDPMKKMQYAIAAMQPV <del>D</del> LDPA                       | 91  |
| BnaA.IND.a | --SETLSHFQ <del>P</del> PTIFSDHG--GGEEAE <del>E</del> EEEEEEEGEEEMDPMKKMQYAIAAMQPV <del>D</del> LDPA           | 91  |
| BolC.IND.a | --SETLSHFQPPPTVFS <del>D</del> HG--GGEEA--EDEEGEEEMDEM <del>K</del> EMQYAIAAMQPV <del>D</del> IDPA             | 88  |
| BnaC.IND.a | --SETLSHFQ <del>P</del> PTVFS <del>D</del> EG--GGEEA--EDEEGEEEIDEM <del>K</del> EMQYAIAAMQPV <del>D</del> IDPA | 88  |
|            | .  :  *::                                          ::**  *::.  **:*  *  **.*.*:*:**                            |     |
|            |                                                                                                                |     |
| HEC        | TVKKPKRRNVRI <del>S</del> DDPQSVAAARHRRERISERIRILQRLVPGG <del>T</del> KMDTASMLDEAIRYV <del>K</del> F           | 173 |
| IND        | TVPKPNRRNVRI <del>S</del> DDPQTVVARRRRERISEKIRILKRIVP <del>G</del> GAKMDTASMLDEAIRY <del>T</del> KF            | 137 |
| BraA.IND.a | TVPKPNRRNV <del>R</del> VSDDPQTVVARRRRERISEKIRILKRMV <del>P</del> GGAKMDTASMLDEAIRY <del>T</del> KF            | 151 |
| BnaA.IND.a | TVPKPNRRNV <del>R</del> VSDDPQTVVARRRRERISEKIRILKRMV <del>P</del> GGAKMDTASMLDEAIRY <del>T</del> KF            | 151 |
| BolC.IND.a | TVPKPNRRNV <del>R</del> VSEDPQTVVARRRRERISEKIRILKRMV <del>P</del> GGAKMDTASMLDEAIRY <del>T</del> KF            | 148 |
| BnaC.IND.a | TVPKPNRRNV <del>R</del> VSEDPQTVVARRRRERISEKIRILKRMV <del>P</del> GGAKMDTASMLDEAIRY <del>T</del> KF            | 148 |
|            | **  *:*:*:*:*:*:*:*:*:*:*:*:*:*:*:*:*:*:*:*:*:*:*:*:*:*:*:***                                                  |     |
|            |                                                                                                                |     |
| HEC        | LKRQIR-LLNNNTGYTPPPPQDQASQAVTTSWVSPPPPPS <del>F</del> GRGGRGVGELI                                              | 224 |
| IND        | LKRQVR-ILQPHSQIGAPMANPSYL-----CYYHNSQP-----                                                                    | 169 |
| BraA.IND.a | LKRQVR-----LASSASHSAWS-----SYV-----                                                                            | 171 |
| BnaA.IND.a | LKRQVRL <del>L</del> LQPH <del>T</del> QLGAPMSDPSCL-----CYYHNSDT-----                                          | 184 |
| BolC.IND.a | LKRQVR-LLQPH <del>T</del> QLGAPMSDPSRL-----CYYHNSDT-----                                                       | 180 |
| BnaC.IND.a | LKRQVR-LLQPH <del>T</del> QLGAPMSDPSRL-----CYYHNSDT-----                                                       | 180 |
|            | ****:*                                          .  .  .                                          .  :          |     |

**Online Resource 1.** Multiple alignment of IND protein sequences from Arabidopsis and Brassica species including HEC3 from Arabidopsis as an outgroup. Alignment was done using ClustalOmega. Mutated residues used in the analysis of the manuscript are indicated by a black circle.

## Online Resource 2

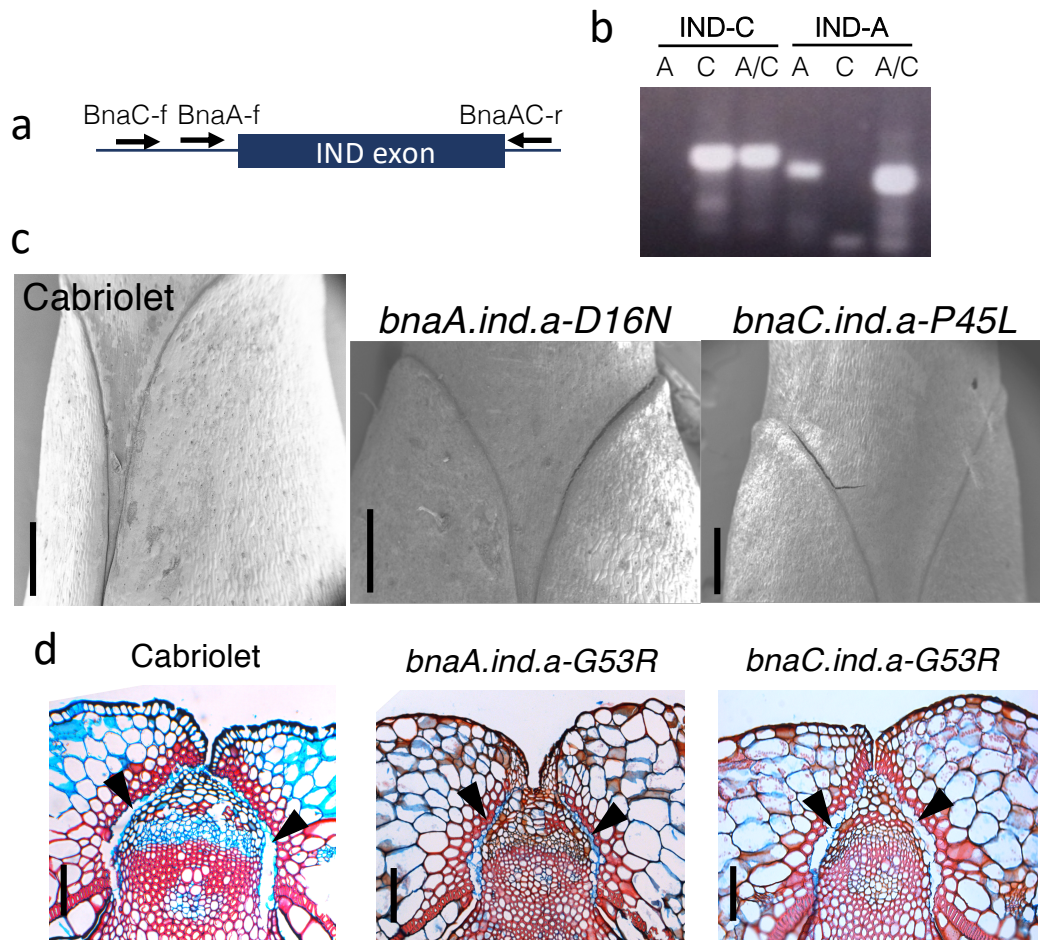

**Online Resource 2.** **a** Schematic outline of *IND* gene showing position of paralogue-specific primers (BnaC-f and BnaA-f) and BnaAC-r, which will amplify both. **b** Agarose gel showing paralogue-specific PCR amplification using primers BnaC-f/BnaAC-r to amplify *BnaC.IND.a* (IND-C) or BnaA-f/BnaAC-r to amplify *BnaA.IND.a* (IND-A) on gDNA from *B. rapa* (A), *B. oleracea* (C) and *B. napus* (A/C). **c** Effect of single mutations in *bna.ind* genes. SEM images of mature (stage 17) fruits from Cabriolet (wild type) and indicated *bna.ind* single mutants. **d** Tissue sections of mature (stage 17c) fruits from Cabriolet (wild type) and indicated *bna.ind* single mutants. *Scale bars* correspond to 1 mm in c and 100  $\mu$ m in d.

## Online Resource 3

**a**

|                   |      | <i>bnac.ind.a</i> |      |      |       |
|-------------------|------|-------------------|------|------|-------|
|                   |      | P45L              | G53R | R95H | T146I |
| <i>bnaa.ind.a</i> | D16N | X                 | X    | X    | X     |
|                   | P45L | -                 | X    | X    | -     |
|                   | G53R | X                 | X    | X    | X     |
|                   | M70I | X                 | X    | -    | X     |

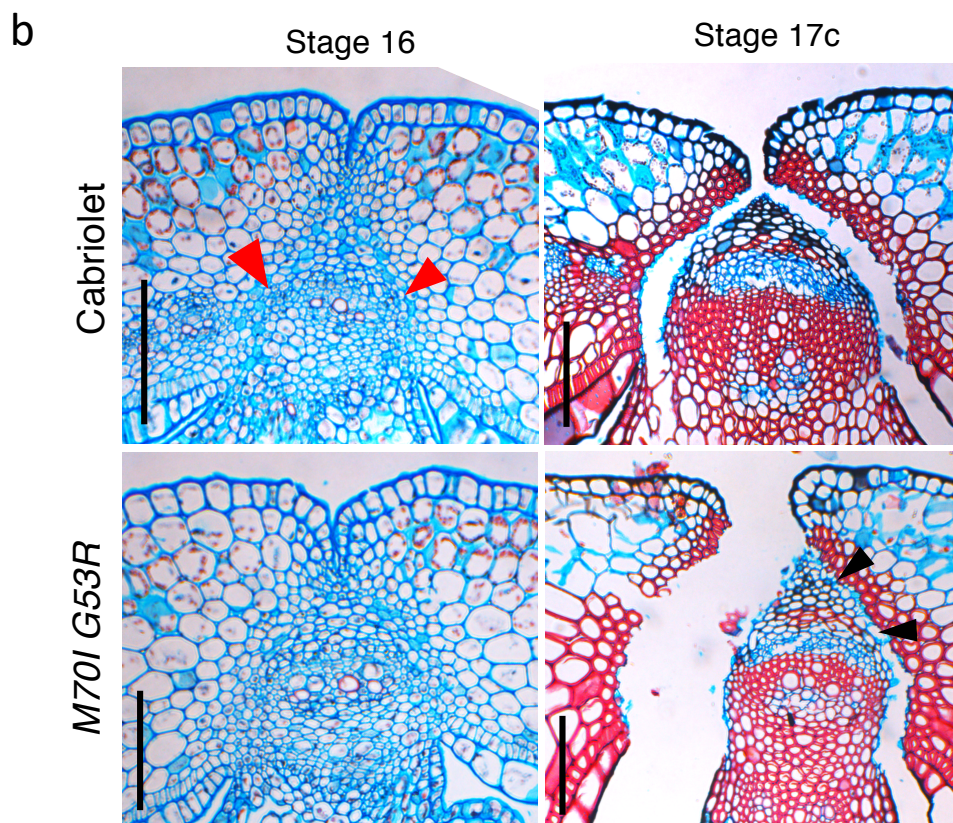

**Online Resource 3. a** Table of double-mutant combinations. ‘X’ indicates fruits were obtained for RIT while ‘-’ indicates no RIT was performed on those lines due to infertile pods. **b** Tissue sections of fruits from Cabriolet (wild type) and the *bnaa.ind.a-M70I bnac.ind.a-G53R* (*M70I/G53R*) double mutant at the indicated developmental stages. Red arrowheads point to separation layer primordium cells in Cabriolet. Black arrowheads indicate lack of complete separation in the *M70I/G53R* double mutant. *Scale bars* correspond to 100  $\mu\text{m}$ .

## Online Resource 4

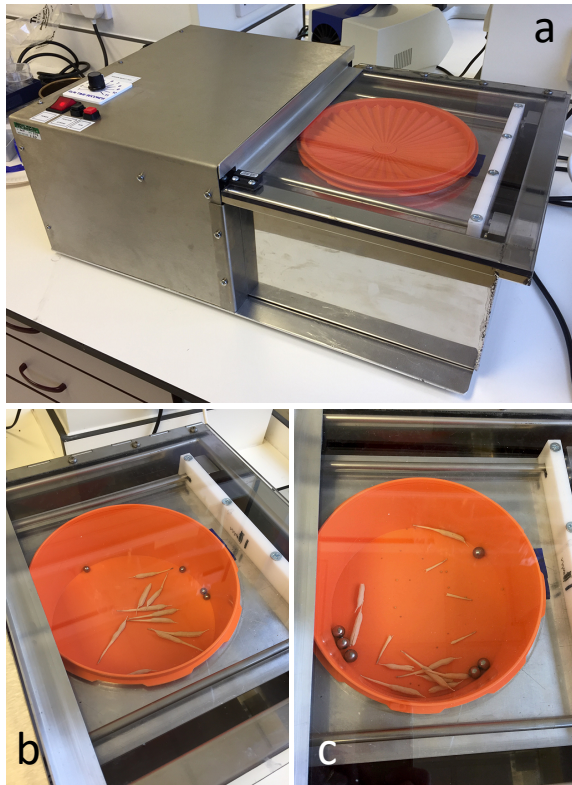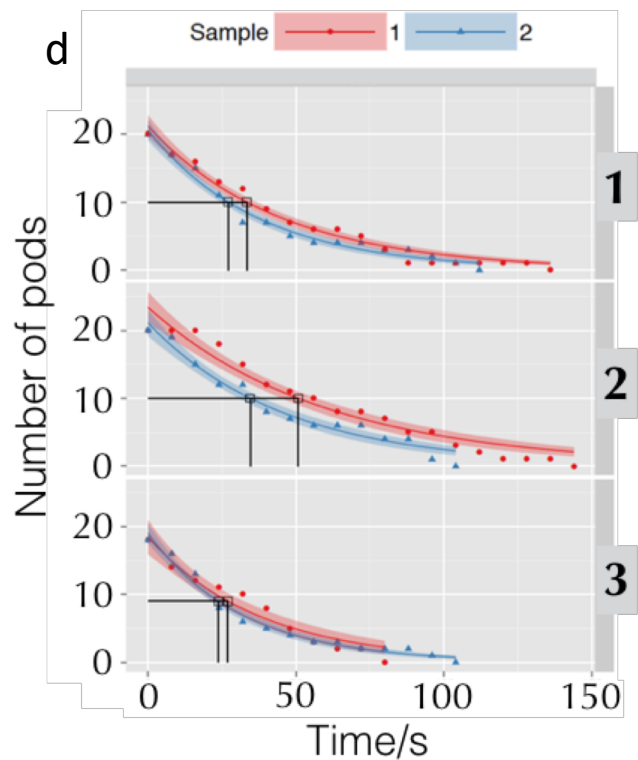

**Online Resource 4.** Random Impact Test analysis and visualisation of the podshatterR software output. **a** RIT machine on lab bench. **b** photo of sample with ball bearings prior to shaking. **c** photo of sample after one round of 8-sec shaking. **d** example of two samples tested in triplicates with number of remaining intact pods plotted against time of shaking. Values are fitted with decay curves calculated by software generated here. RIT<sub>50</sub> values are calculated as the time it takes to break 10 pods out of 20.

## Online Resource 5

|            |                                                                     |     |
|------------|---------------------------------------------------------------------|-----|
| AtGA4      | MPAMLTDFVFRGHPIHLP HSHIPDFTSLREL PDSYKWT PKDDL LFS AAPSP PATGENIPLI | 60  |
| BnaC5 .GA4 | MPTMLTDVFRGHPIHLP HSHQPDFTSLSEL PDSYTWTPKDD PLLDAAPSP PAASENIPLI    | 60  |
| BnaA6 .GA4 | MPTMLTDVFRGHPIHLP HSHQPDFTSLSEL PDSYTWTPKDD PLLDAAPSP PAASENIPLI    | 60  |
| BnaC8 .GA4 | MPTVLTDFVFRGHPIHLP HTHQPDFTSLSEL PDSYTWTSKDD PLFTAPPSP PGAGESIPLI   | 60  |
| BnaA9 .GA4 | MPTVLTDFVFRGHPIHLP HTHQPDFTSLSEL PDSYTWTSKDD PLFTAPPSP PDAGESIPLI   | 60  |
|            | **::*****:*****:* ***** *****_* ** ** * : * **** :_* *****          |     |
| AtGA4      | DLDHPDATNQIGHACRTWGAFQISNHGVPLGLLQDIEFLTGS LFG LPVQRK LKSARSETG     | 120 |
| BnaC5 .GA4 | DLNH PDAANQIGSACRTWGAFQIANHGVPLELLQGIEFLTGS LFG LPVHRK LKAARSETG    | 120 |
| BnaA6 .GA4 | DLNH PDAANQIGSACRTWGAFQIANHGVPLELLQGIEFLTGS LFG LPVQRK LKAARSETG    | 120 |
| BnaC8 .GA4 | DLNH PDAANQIGRACRTWGAFQIANHGVPLELLQDIEFLTGS LFG LPVQH KLEAARS DAG   | 120 |
| BnaA9 .GA4 | DLNH PDAANQIGRACRTWGAFQIANHGVPLELLQGIEFLTGS LFG LPVQRK LKAARS DTG   | 120 |
|            | **::****:**** *****:***** **_* ***** **_*::**::****:****            |     |
| AtGA4      | VSGYGVARIA SFFNKOMWSEGF TITGSP LNDFRKLWPQHHL-NYCDIVEE YEEHMKKLAS    | 179 |
| BnaC5 .GA4 | FSGYGVARIA SFFNKOMWSEGF TITGSP LNDFRKLWPQHHLNNYCDIVEE YEEQMOKKLAS   | 180 |
| BnaA6 .GA4 | FSGYGVARIA SFFNKOMWSEGF TITGSP LNDFRKLWPQHHLNNYCDIVEE YEEQMOKKLAS   | 180 |
| BnaC8 .GA4 | FSGYGVARIA SFFNKKMWSEGF TITGSP LNDFRKLWPLHL-NYCDIVEE YEEQMOKKLAS    | 179 |
| BnaA9 .GA4 | FSGYGVARIA SFFNKKMWSEGF TITGSP LNDFRKLWPLHL-NYCDIVEE YEEQMOKKLAS    | 179 |
|            | _*****:*****:***** ***** ** *****:****:****                         |     |
| AtGA4      | KLMW LALNSLGVSEEDIEWASLSSDLNWAQAALQLNHYPVCPEPDRAMGLAAHTDSTLLT       | 239 |
| BnaC5 .GA4 | KLMW LSLTSLGVSEEDIK WASANS DSDWAQSALQLNHYPVCPEPDRAMGLAAHTDSTLLT     | 240 |
| BnaA6 .GA4 | KLMW LSLTSLGVSEEDIK WASANPDLNWAQAALQLNHYPVCPEPDRAMGLAAHTDSTLLT      | 240 |
| BnaC8 .GA4 | KLMW LSLNSLGVSEEDIKWARVSSDLNWAQAALQLNHYPVCPEPDRAMGLAPHTDSTLLT       | 239 |
| BnaA9 .GA4 | KLMW LSLNSLGVTEEDIKWATVSSDLNWAQAALQLNHYPVCPEPDRAMGLAPHTDSTLLT       | 239 |
|            | *****:_*_***:* **_* **_* **_*::***** *****                          |     |
| AtGA4      | ILYQNNTAGLQVFRDDL GWVTVPPFPGSLV VNVGDLFHILSNGLFKSVLHRARVNQTRAR      | 300 |
| BnaC5 .GA4 | ILHQ NNTAGLQVFRDDL GWVTVPPVPGSLV VNVGDLFHILSNGLFKSVLHRARVNQTRSR     | 300 |
| BnaA6 .GA4 | ILHQ NNTAGLQVFRDDL GWVTVPPVPGSLV VNVGDLFHILSNGLFKSVLHRARVNQTRSR     | 300 |
| BnaC8 .GA4 | ILYQNNTAGLQVFRDDL GWVTVPPVPGSLV VNVGDLFHILSNGLFKSVIHRVRVNQTRPR      | 300 |
| BnaA9 .GA4 | ILYQNNTAGLQVFRDDFGWVTVPPVPGSLV VNVGDLFHILSNGLFKSVIHRARVNQTRPR       | 300 |
|            | **::*****:*****_*_* ***** *****:****_* ***** *                      |     |
| AtGA4      | LSVAFLWGPQSDIKISPV PKLVSPVESP LYQSVTWKEYLRTKATHFNKALSMIRNHREE       | 358 |
| BnaC5 .GA4 | LSVAFLWGPQSDIKISPV PKLVSPVGSPLYRSVTWTEYLRTKATHFNEALSMIRNHIDE        | 359 |
| BnaA6 .GA4 | LSVAFLWGPQSDIKISPV PKLVSPVGSPLYRSVTWTEYLRTKATHFNEALSMIKNDIDE        | 359 |
| BnaC8 .GA4 | LSVAFLWGP RSDTKISPV PKLVSPDESPLYRSVTWTEYLRTKATHFNKALSMIRNHREK       | 358 |
| BnaA9 .GA4 | LSVAFLWGP RSDTKISPV PKLVSPDESPLYRSVTWTEYLRTKATHFNKALSMIRNHREK       | 358 |
|            | *****:*** ***** *****:*****_* *****:****_* **_*::                   |     |

**Online Resource 5.** Multiple alignment of GA4 protein sequences from Arabidopsis and Brassica species. Alignment was done using ClustalOmega. Mutated residues used in the analysis of the manuscript are indicated by a black circle.

## Online Resource 6

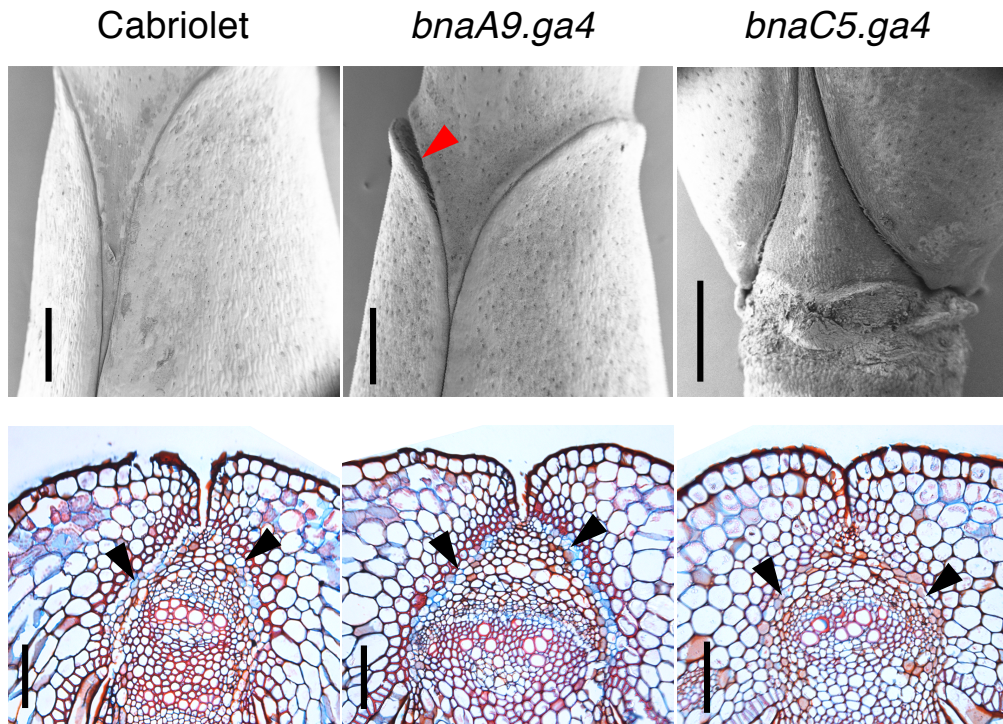

**Online Resource 6.** Effect of mutations in *bna.ga4* genes. SEM (upper row) and tissue section (lower row) images of mature (stage 17) fruits from Cabriolet (wild type), *bnaA.ga4* and *bnaC.ga4* single mutants. Red arrowhead indicates valve that is opening, black arrowheads point to separation layer in cross sections. *Scale bars* correspond to 1 mm for SEMs and 100  $\mu\text{m}$  for sections.

## Online Resource 7

### Oligonucleotides used in this study

#### ***Bna . GA4***

A6-F      gtccaacacttccataatcttcc

A6-R      GAATGACATGGCGAAATCTCTGT

C5-F      gactctccgactcttccataatt

C5-R      ACATGGCAAATTTTCGGTTTCT

C8-F      gacacaaaacatctatcgaat

C8-R      gccgtcttttagcatatgtaaattgagccg

A9-F      ccaaaaacaagagcttaaacadatgc

A9-R      gcaaccaatatatatcatgacc

#### ***Bna . IND***

IND A-F      aacattcatacacgcactac

IND A-R      atcaacatgaaacgcgtgat

IND C-F      ccgcaaatacaaacatatttagt

IND C-R      atcaacatgaaacgcgtgat
